# Supplementary material for: Association of Thyroid Function with Suicidal Behavior: A Systematic Review and Meta-Analysis
Source: MDPI journal article supplement (doi:10.3390/medicina57070714), 2021-07-15
Supplement: s1 [file s1]

## Ovid MEDLINE(R) and Epub Ahead of Print, In-Process & Other Non-Indexed Citations, and Daily <1946 to July 20, 2018>

Search history sorted by search number ascending

| # | Searches                                                                                                                                                                                                                                                                                                                                       | Results | Type     |
|---|------------------------------------------------------------------------------------------------------------------------------------------------------------------------------------------------------------------------------------------------------------------------------------------------------------------------------------------------|---------|----------|
| 1 | ptsd.mp. or exp Stress Disorders, Post-Traumatic/                                                                                                                                                                                                                                                                                              | 34136   | Advanced |
| 2 | ((posttraumatic or "post traumatic") adj2 (neurosis or stress)).mp. [mp=title, abstract, original title, name of substance word, subject heading word, floating sub-heading word, keyword heading word, protocol supplementary concept word, rare disease supplementary concept word, unique identifier, synonyms]                             | 38058   | Advanced |
| 3 | stress disorder, traumatic/ or stress, psychological/ or (psychological adj3 trauma*).mp.                                                                                                                                                                                                                                                      | 111580  | Advanced |
| 4 | or/1-3trau                                                                                                                                                                                                                                                                                                                                     | 146293  | Advanced |
| 5 | exp Hypothyroidism/ or Hypothyroidism/ or hypothyroid*.mp. or hyperthyroid*.mp. or thyroid*.mp. [mp=title, abstract, original title, name of substance word, subject heading word, floating sub-heading word, keyword heading word, protocol supplementary concept word, rare disease supplementary concept word, unique identifier, synonyms] | 225553  | Advanced |
| 6 | exp Thyroid Hormones/an, bl, df, tu [Analysis, Blood, Deficiency, Therapeutic Use]                                                                                                                                                                                                                                                             | 33322   | Advanced |
| 7 | (tsh or t3 or triiodothyronine or t4 or thyroxine or levothyroxin*).mp. [mp=title, abstract, original title, name of substance word, subject heading word, floating sub-heading word, keyword heading word, protocol supplementary concept word, rare disease supplementary concept word, unique identifier, synonyms]                         | 120668  | Advanced |
| 8 | 5 or 6 or 7                                                                                                                                                                                                                                                                                                                                    | 289355  | Advanced |
| 9 | 4 and 8                                                                                                                                                                                                                                                                                                                                        | 763     | Advanced |

|    |                                                                                                                                                                                                                                                                  |      |          |
|----|------------------------------------------------------------------------------------------------------------------------------------------------------------------------------------------------------------------------------------------------------------------|------|----------|
| 10 | 8 and suicid*.mp. [mp=title, abstract, original title, name of substance word, subject heading word, floating sub-heading word, keyword heading word, protocol supplementary concept word, rare disease supplementary concept word, unique identifier, synonyms] | 372  | Advanced |
| 11 | 9 or 10                                                                                                                                                                                                                                                          | 1126 | Advanced |
| 12 | remove duplicates from 11                                                                                                                                                                                                                                        | 1126 |          |

**CENTRAL = 104**

#### Embase <1988 to 2018 Week 30>

Search history sorted by search number ascending

| # | Searches                                                                                                                                                                                                                                                                          | Results | Type     |
|---|-----------------------------------------------------------------------------------------------------------------------------------------------------------------------------------------------------------------------------------------------------------------------------------|---------|----------|
| 1 | exp posttraumatic stress disorder/                                                                                                                                                                                                                                                | 50249   | Advanced |
| 2 | ((psychological or trauma* or post trauma* or posttrauma*) adj3 (stress* or neurosis)).mp. [mp=title, abstract, heading word, drug trade name, original title, device manufacturer, drug manufacturer, device trade name, keyword, floating subheading word, candidate term word] | 70812   | Advanced |
| 3 | pstd.mp.                                                                                                                                                                                                                                                                          | 105     | Advanced |
| 4 | or/1-3                                                                                                                                                                                                                                                                            | 70843   | Advanced |
| 5 | exp hypothyroidism/                                                                                                                                                                                                                                                               | 49222   | Advanced |
| 6 | thyroid hormone/                                                                                                                                                                                                                                                                  | 24199   | Advanced |
| 7 | exp thyromimetic agent/                                                                                                                                                                                                                                                           | 72931   | Advanced |
| 8 | exp hyperthyroidism/                                                                                                                                                                                                                                                              | 30920   | Advanced |

|    |                                                                          |        |          |
|----|--------------------------------------------------------------------------|--------|----------|
| 9  | or/5-8                                                                   | 123453 | Advanced |
| 10 | 4 and 9                                                                  | 246    | Advanced |
| 11 | limit 10 to human                                                        | 222    | Advanced |
| 12 | remove duplicates from 11                                                | 219    | Advanced |
| 13 | 12 not case report/                                                      | 184    | Advanced |
| 14 | suicide attempt/ or suicidal ideation/ or suicidal behavior/ or suicide/ | 79342  | Advanced |
| 15 | 9 and 14                                                                 | 586    | Advanced |
| 16 | limit 15 to human                                                        | 572    | Advanced |
| 17 | 16 not case report/                                                      | 410    | Advanced |
| 18 | remove duplicates from 17                                                | 408    | Advanced |
| 19 | 13 or 18                                                                 | 582    |          |

### PsycINFO <1967 to July Week 3 2018>

Search history sorted by search number ascending

| # | Searches                                                                                                                       | Results | Type     |
|---|--------------------------------------------------------------------------------------------------------------------------------|---------|----------|
| 1 | posttraumatic stress disorder/ or acute stress disorder/ or emotional trauma/ or post-traumatic stress/ or traumatic neurosis/ | 40889   | Advanced |
| 2 | combat fatigue.mp.                                                                                                             | 40      | Advanced |
| 3 | shell shock*.mp.                                                                                                               | 131     | Advanced |
| 4 | or/1-3                                                                                                                         | 40970   | Advanced |
| 5 | hypothyroidism/ or hyperthyroidism/ or thyroid disorders/ or thyrotropin/ or thyroxine/                                        | 2219    | Advanced |
| 6 | suicidal ideation/ or exp attempted suicide/ or exp suicide/                                                                   | 36011   | Advanced |

|    |                                                                                                                                                                                                                                               |      |          |
|----|-----------------------------------------------------------------------------------------------------------------------------------------------------------------------------------------------------------------------------------------------|------|----------|
| 7  | exp thyroid hormones/ or thyrotropin*.mp. or thyroxine*.mp. or levothyroxine*.mp. or t3.mp. or t4.mp. or hypothyro*.mp. or thyroid*.mp. [mp=title, abstract, heading word, table of contents, key concepts, original title, tests & measures] | 7983 | Advanced |
| 8  | thyroid gland/                                                                                                                                                                                                                                | 239  | Advanced |
| 9  | (4 or 6) and (5 or 7 or 8)                                                                                                                                                                                                                    | 207  | Advanced |
| 10 | limit 9 to all journals                                                                                                                                                                                                                       | 192  |          |

## Scopus

( TITLE-ABS-KEY ( suicid\* OR ptsd OR ( ( combat OR war OR posttrauma\* OR "post trauma\*" ) W/3 ( stress\* OR psychologic\* OR distress OR neurosis ) ) ) AND TITLE-ABS-KEY ( thyroid\* OR thyroxin\* OR levothyroxin\* OR hypothyroid\* OR hyperthyroid\* OR thyrotropin OR t4 OR t3 OR triiodothyronine ) ) AND ( LIMIT-TO ( DOCTYPE , "ar" ) OR LIMIT-TO ( DOCTYPE , "re" ) OR LIMIT-TO ( DOCTYPE , "le" ) ) = 1432
