# Supplementary material for: Association of Thyroid Function with Suicidal Behavior: A Systematic Review and Meta-Analysis
Source: MDPI journal article supplement (doi:10.3390/medicina57070714), 2021-07-15
Supplement: s1 [file s1]

**Table S1.** Summary of risk of bias assessment for the included studies.

| Study         | Study type   | Selection<br>(Maximum: ☆☆☆) | Comparability<br>(Maximum: ☆☆) | Outcome<br>(Maximum: ☆☆☆) |
|---------------|--------------|-----------------------------|--------------------------------|---------------------------|
| Duval, 2010   | Case-control | ☆☆☆                         | ☆☆                             | ☆                         |
| Duval, 2017   | Case-control | ☆☆☆                         | -                              | ☆☆                        |
| Jokinen, 2008 | Case-control | ☆☆☆☆                        | ☆☆                             | ☆☆                        |
| Jose, 2015    | Case-control | ☆☆☆☆                        | ☆☆                             | -                         |
| Ozcan, 2016   | Case-control | ☆☆☆                         | ☆☆                             | ☆☆☆                       |

  

| Study                     | Study type      | Selection<br>(Maximum: ☆☆☆) | Comparability<br>(Maximum: ☆☆) | Outcome<br>(Maximum: ☆) |
|---------------------------|-----------------|-----------------------------|--------------------------------|-------------------------|
| Baek, 2014                | Cross-sectional | ☆☆                          | ☆☆                             | -                       |
| Berlin, 1999              | Cross-sectional | ☆☆☆                         | ☆☆                             | ☆                       |
| Butkute- Sliuoziene, 2018 | Cross-sectional | ☆☆                          | -                              | -                       |
| Khurshid, 2018            | Cross-sectional | ☆☆☆                         | ☆☆                             | -                       |
| Kim, 2013                 | Cross-sectional | ☆☆                          | ☆☆                             | -                       |
| Maes, 1989                | Cross-sectional | ☆☆☆                         | ☆☆                             | -                       |
| Pompili, 2012             | Cross-sectional | ☆☆☆                         | ☆☆                             | ☆                       |
| Peng, 2018                | Cross-sectional | ☆☆☆                         | -                              | ☆                       |

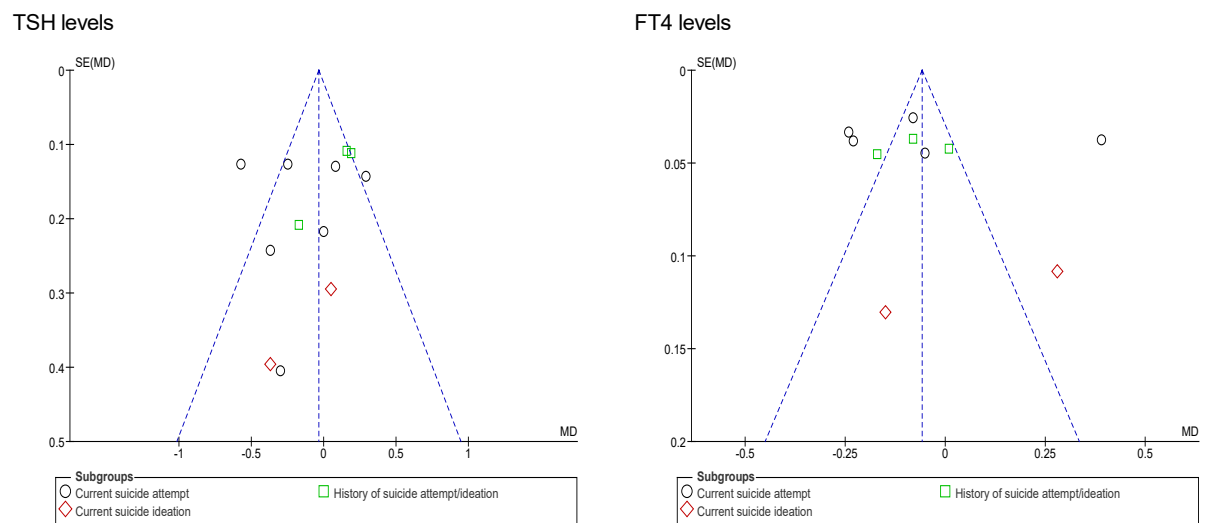

**Figure S1.** Funnel plots for publication bias analysis.

## A) TSH levels

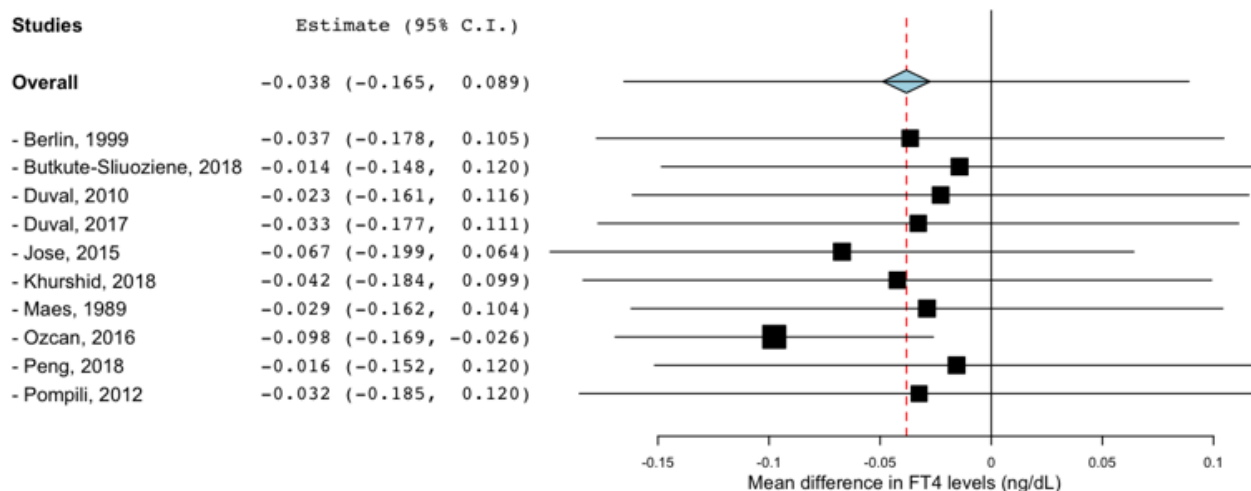

## B) FT4 levels

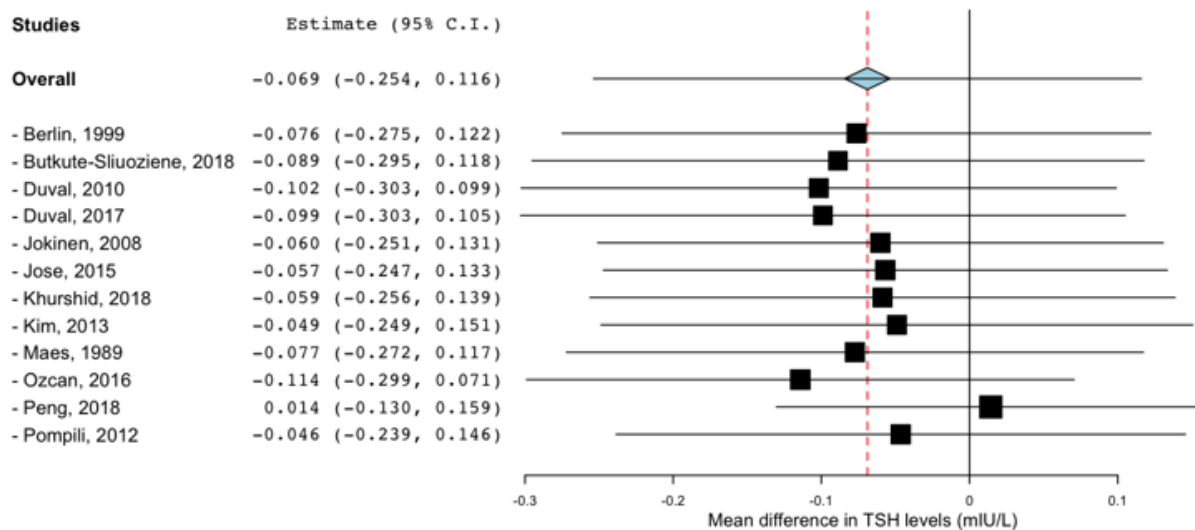

Figure S2. Leave-one-out sensitivity analysis of the studies included.
